# Supplementary material for: Viral Delivery of CAR Targets to Solid Tumors Enables Effective Cell Therapy
Source: PubMed Central journal article supplement (PMC7183102; doi:10.1016/j.omto.2020.03.018), 2020-04-07
Supplement: mmc1.pdf [file mmc1.pdf]

**OMTO, Volume 17**

## **Supplemental Information**

### **Viral Delivery of CAR Targets to Solid Tumors**

#### **Enables Effective Cell Therapy**

**Amin Aalipour, Fabrice Le Boeuf, Matthew Tang, Surya Murty, Federico Simonetta, Alexander X. Lozano, Travis M. Shaffer, John C. Bell, and Sanjiv S. Gambhir**

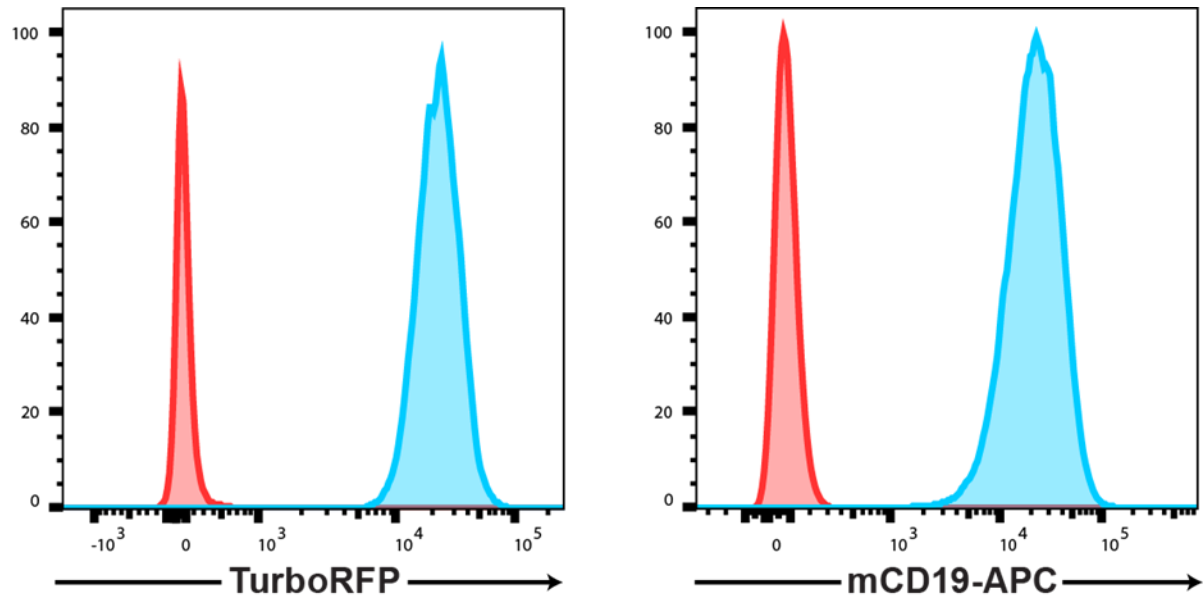

**Supplementary Figure S1. Generation of engineered B16 cell lines.**

Three cell lines were generated: B16-TurboRFP/RLuc8, B16-mCD19, and B16-TurboRFP/RLuc8-mCD19. Flow cytometry confirms uniform expression of TurboRFP (left) and mCD19 (right) transgenes. Data shown for B16-TurboRFP/RLuc8-mCD19 cell line (blue) relative to native B16 cell line (red).

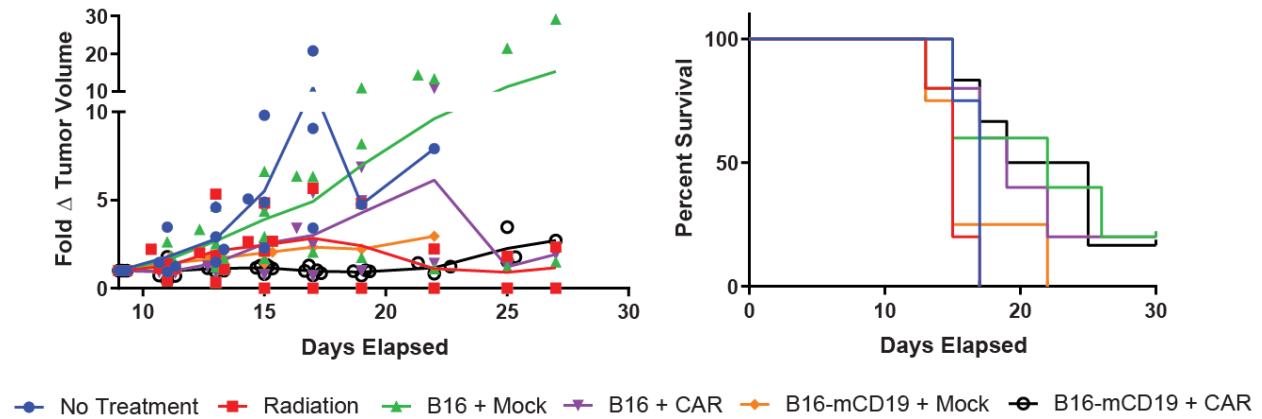

**Supplementary Figure S2. Intravenous delivery of mCD19 CAR T-cells is ineffective against B16 tumors constitutively expressing mCD19.**

Intravenously delivered mCD19 CAR T-cells do not significantly delay B16-mCD19 tumor progression *in vivo* (left) or confer a survival benefit (right) relative to tumors treated with 5Gy TBI (radiation), mock T-cells, or antigen negative tumors treated with either mock or CAR T-cells. Kaplan-Meier survival curve  $p = 0.0902$ ,  $df = 5$ , Chi square = 9.514 by Mantel-Cox test. Number of independent mice in each group as follows:  $n = 4$  (No Treatment),  $n = 5$  (Radiation),  $n = 5$  (B16 + Mock),  $n = 5$  (B16 + CAR),  $n = 4$  (B16-mCD19 + Mock), and  $n = 6$  (B16-mCD19 + CAR).

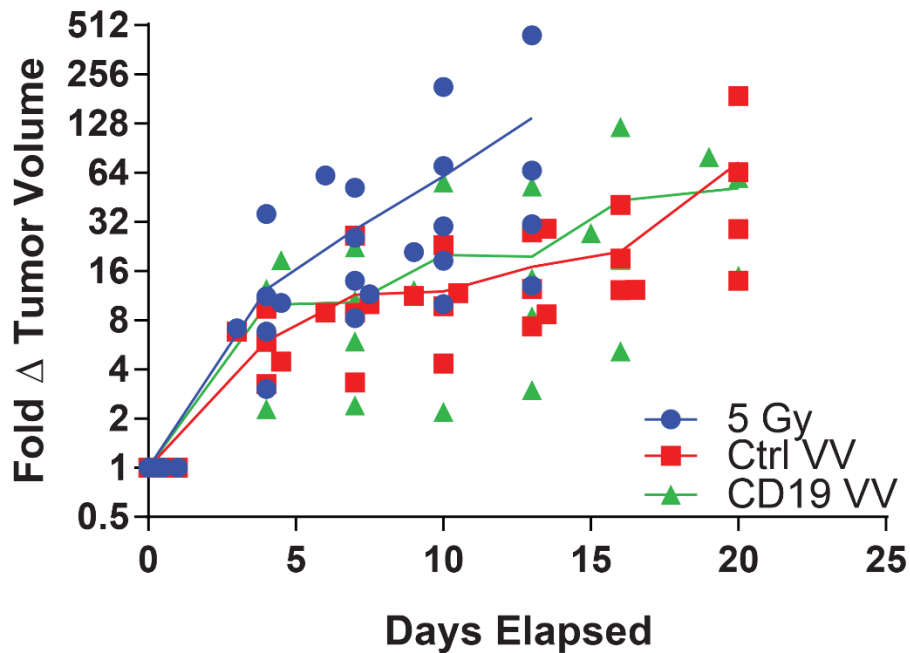

**Supplementary Figure S3. Therapeutic index of vaccinia viruses as single agents.**

Intratumoral Control VV (n = 5 independent mice) and mCD19 VV (n = 4 independent mice) combined with TBI can yield modest delays in B16 tumor progression relative to mice only receiving TBI (n = 6 independent mice). TBI Only vs. Control VV: day 11 tumor volume p = 0.0040, t = 3.836, df = 9. TBI Only vs. CD19 VV: day 11 tumor volume p = 0.0246, t = 2.762, df = 8. The two viruses also have a similar therapeutic index *in vivo* Control VV vs. CD19 VV: p = 0.7293, t = 0.3602, df = 7.

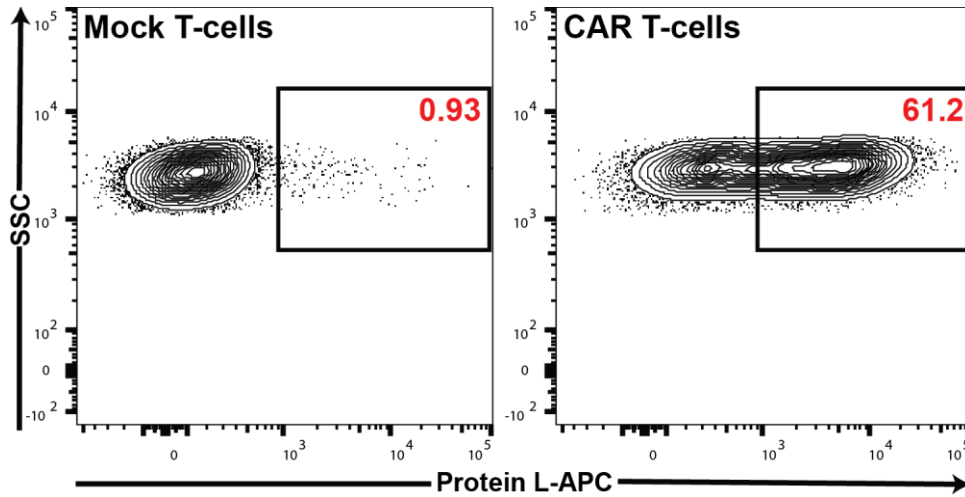

**Supplementary Figure S4. Generation of murine mCD19 CAR T-cells.**

Retroviral transduction of primary murine T-cell achieved efficiencies of ~50-65% and can be measured by staining chimeric antigen receptors with Protein L.
